# Supplementary material
Source: MDPI journal article supplement (https://www.mdpi.com/2673-4591/56/1/79)
Supplement: s1 [file s1 › engproc-2736843-supplementary.pdf]

## Supplementary Materials

**Table S1.** The detailed list of the selected granted patents related to extraction methods applied to natural *Lamiaceae*-derived compounds.

| Patent        | Jurisdiction * | Title                                                                                                                                  | Publication date   | Ref. |
|---------------|----------------|----------------------------------------------------------------------------------------------------------------------------------------|--------------------|------|
| US11622987B2  | US             | Aqueous extraction process of plants, method thereof, and product by process                                                           | April 11, 2023     | [1]  |
| KR102512785B1 | KR             | Method for extracting the active ingredients of herbs by eco-friendly mechanochemical assisted extraction technique                    | March 23, 2023     | [2]  |
| EP3280276B1   | EP             | Eutectic extraction solvent and extraction methods by eutectigenesis using this solvent                                                | June 3, 2020       | [3]  |
| KR102109980B1 | KR             | Compositions for sound sleep comprising the extraction of lettuce tuckahoe and rosemary and its manufacturing methods                  | May 12, 2020       | [4]  |
| US9327006B2   | US             | Extraction of B-vitamins from plant matter                                                                                             | May 3, 2016        | [5]  |
| US9173914B2   | US             | Extraction technology of Xiao-yao-drink                                                                                                | November 3, 2015   | [6]  |
| CN103027942B  | CN             | Superfine grinding low-temperature extraction method for <i>Clinopodium polycephalum</i>                                               | July 15, 2015      | [7]  |
| CN103027941B  | CN             | Acid-base low-temperature extraction method for <i>Clinopodium polycephalum</i>                                                        | March 25, 2015     | [8]  |
| CN102212423B  | CN             | Carbon dioxide supercritical extraction method for extracting <i>Ziziphora bungeana</i> Juz.oil by using alcohol as entrainer          | March 6, 2013      | [9]  |
| CN101380356B  | CN             | Tibetan medicine Duiyiwei total flavone extract and extraction method and use thereof                                                  | December 19, 2012  | [10] |
| CN101669988B  | CN             | Extraction process of <i>Clerodendranthus spicatus</i>                                                                                 | June 27, 2012      | [11] |
| CN101084991B  | CN             | Tibetan medicine tangut dragonhead extraction and its application in preparing antivirus medicine                                      | May 23, 2012       | [12] |
| CN101524402B  | CN             | Method for extracting volatile oil from <i>Ziziphora clinopodioides</i> Lam herb by CO <sub>2</sub> supercritical extraction technique | September 28, 2011 | [13] |
| CN1887309B    | CN             | Extraction of effective red sage components for preventing and treating osteoporosis and depression                                    | June 22, 2011      | [14] |
| CN1751706B    | CN             | Method for extraction of red-rooted <i>Salvia</i>                                                                                      | March 23, 2011     | [15] |
| CN100502901C  | CN             | Extraction method for effective parts of <i>Salvia</i>                                                                                 | June 24, 2009      | [16] |
| CN100478003C  | CN             | <i>Rabdosia</i> extraction method                                                                                                      | April 15, 2009     | [17] |
| CA2353933C    | CA             | Method for simultaneous extraction of essential oils and antioxidants from <i>Lamiaceae</i> species and the extract products thereof   | February 12, 2008  | [18] |
| CA2169791C    | CA             | Process for the extraction of antioxidants from vegetable matter                                                                       | June 6, 2006       | [19] |
| KR100378904B1 | KR             | Extraction of growth hormone releasing factor from natural medicinal plants and water-soluble <i>Phlomis radix</i> extract             | August 21, 2003    | [20] |

\* US: United States, EP: Europe, CN: China, CA: Canada, KR: Republic of Korea.

## References

1. Duncan, W.P.; Gollahon, L.S.; Putnam, W.C. Aqueous extraction process of plants, method thereof, and product by process. Granted Patent: US11622987B2, 11 April 2023.
2. Choi, Y. Method for Extracting the Active Ingredients of Herbs by Eco-Friendly Mechanochemical Assisted Extraction Technique. Granted Patent: KR102512785B1, 23 March 2023.
3. Lavaud, A.; Laguerre, M.; Birtic, S.; Fabiano Tixier, A.S.; Roller, M.; Chemat, F.; Bily, A.C. Eutectic Extraction Solvent and Extraction Methods by Eutectigenesis Using This Solvent. Granted Patent: EP3280276B1, 3 June 2020.
4. Sohn, H.Y.; Cho, B.T.; Park, J.Y. Compositions for Sound Sleep Comprising the Extraction of Lettuce Tuckahoe and Rosemary and Its Manufacturing Methods. Granted Patent: KR102109980B1, 12 May 2020.
5. Rajendran, R.; Rajendran, K. Extraction of B-vitamins from plant matter. Granted Patent: US9327006B2, 3 May 2016.
6. Chuu, J.-J.; Kao, M.-W. Extraction technology of Xiao-yao-drink. Granted Patent: US9173914B2, 3 November 2015.
7. Jiang, Y. Superfine grinding low-temperature extraction method for *Clinopodium polycephalum*. Granted Patent: CN103027942B, 15 July 2015.
8. Jiang, Y. Acid-base low-temperature extraction method for *Clinopodium polycephalum*. Granted Patent: CN103027941B, 25 March 2015.
9. Li, X. Carbon dioxide supercritical extraction method for extracting *Ziziphora bungeana* Juz. oil by using alcohol as entrainer. Granted Patent: CN102212423B, 6 March 2013.
10. Zhou, G.; Wang, S.; Qiu, N.; Yang, R. Tibetan medicine Duiyiwei total flavone extract and extraction method and use thereof. Granted Patent: CN101380356B, 19 December 2012.
11. Youquan, L. Extraction process of *Clerodendranthus spicatus*. Granted Patent: CN101669988B, 27 June 2012.
12. Yonghong, F.; Hongyu, L.; Dejuan, Z.; Tian, Y.; Chunjiang, Z. Tibetan medicine tangut dragonhead extraction and its application in preparing antiviral medicine. Granted Patent: CN101084991B, 23 May 2012.
13. Taxi, A.; Reyimuguli, A.; Aisa, A.; Hao, S. Method for extracting volatile oil from *Ziziphora clinopodioides* Lam herb by CO<sub>2</sub> supercritical extraction technique. Granted Patent: CN101524402B, 28 September 2011.
14. Tie, W.; Jiantao, L.; Liao, C.; Yu, S. Extraction of effective red sage components for preventing and treating osteoporosis and depression. Granted Patent: CN1887309B, 22 June 2011.
15. Wensheng, Z. Method for extraction of red-rooted *Salvia*. Granted Patent: CN1751706B, 23 March 2011.
16. Wensheng, Z.; Zhijuan, H.; Dekun, L.; Hongshui, Y.; Feng, W. Extraction method for effective parts of *Salvia*. Granted Patent: CN100502901C, 24 June 2009.
17. Hai, Z. *Rabdosia* extraction method. Granted Patent: CN100478003C, 15 April 2009.
18. Haworth, J.E.; Brinkhaus, F.; Greaves, J.A. Method for Simultaneous Extraction of Essential Oils and Antioxidants From *Lamiaceae* Species and the Extract Products Thereof. Granted Patent: CA2353933C, 12 February 2008.
19. Aeschbach, R.; Rossi, P. Process for the Extraction of Antioxidants From Vegetable Matter. Granted Patent: CA2169791C, 6 June 2006.
20. Kwon, S.C. Extraction of Growth Hormone Releasing Factor From Natural Medicinal Plants and Water-Soluble *Phlomis radix* Extract. Granted Patent: KR100378904B1, 21 August 2003.
